# Supplementary material for: Intakes of whole grain in an Italian sample of children, adolescents and adults
Source: Springer Nature journal article supplement (doi:10.1007/s00394-015-1097-5), 2015-11-20
Supplement: MOESM1 [file 8392544]

Article title: Intakes of whole grain in an Italian sample of children, adolescents and adults

Journal name: European Journal of Nutrition

Author names: Stefania Sette, Laura D'Addezio, Raffaella Piccinelli, Sinead Hopkins, Cinzia Le Donne, Marika Ferrari, Lorenza Mistura, Aida Turrini

Corresponding author: Stefania Sette – crea - Consiglio per la ricerca in agricoltura e l'analisi dell'economia agraria – Centro di ricerca Alimenti e Nutrizione

Email: stefania.sette@entecra.it

**Table A** - Dietary reference values used for the PANDiet index

| Items                                          | Adequacy score                      |                          | Moderation score             |                          |
|------------------------------------------------|-------------------------------------|--------------------------|------------------------------|--------------------------|
|                                                | Reference value <sup>1</sup>        | Variability <sup>2</sup> | Reference value <sup>1</sup> | Variability <sup>2</sup> |
| Total carbohydrate (% of energy <sup>3</sup> ) | 45                                  | 0%                       | 60                           | 0%                       |
| Total Fat (% of energy <sup>3</sup> )          | 20                                  | 0%                       | 35                           | 0%                       |
| SFA % (% of energy <sup>3</sup> )              | -                                   | -                        | 10                           | 15%                      |
| Cholesterol (mg)                               |                                     | -                        | 300                          | 15%                      |
| Sodium (mg)                                    | -                                   | -                        | 2000                         | 15%                      |
| Protein (g/kg body weight)                     | 0.71                                | 13.8%                    |                              |                          |
| PUFA (% of energy <sup>3</sup> )               | 5                                   | 15%                      | Tolerable Upper Intake       |                          |
| Dietary fibre (g)                              | 25                                  | 10%                      |                              |                          |
| Vitamin A (µg)                                 | 400 or 500                          | 15%                      | 3000                         |                          |
| Thiamine (mg)                                  | 0.9 or 1                            | 15%                      |                              |                          |
| Riboflavin (mg)                                | 1.1 or 1.3                          | 15%                      |                              |                          |
| Niacin (mg)                                    | 14                                  | 15%                      | 900                          |                          |
| Vitamin B <sub>6</sub> (mg)                    | 1.1 or 1.4                          | 15%                      | 25                           |                          |
| Folate (µg)                                    | 1000                                | 10%                      |                              |                          |
| Vitamin B <sub>12</sub> (µg)                   | 2                                   | 10%                      |                              |                          |
| Vitamin C (mg)                                 | 60 or 75                            | 15%                      |                              |                          |
| Vitamin D (µg)                                 | 10                                  | 15%                      |                              |                          |
| Vitamin E (mg)                                 | 12 or 13                            | 15%                      | 300                          |                          |
| Calcium (mg)                                   | 800 or 1000                         | 15%                      | 2500/2000                    |                          |
| Magnesium (mg)                                 | 170                                 | 10%                      | 250                          |                          |
| Zinc (mg)                                      | 7 or 9                              | 15%                      | 25                           |                          |
| Phosphorous (mg)                               | 580                                 | 15%                      |                              |                          |
| Potassium (mg)                                 | 3900                                | 15%                      |                              |                          |
| Iron (mg)                                      | Based on tables by IoM <sup>2</sup> |                          |                              |                          |

<sup>1</sup>Source: Dietary reference Intake of nutrients and energy for the Italian population [43]<sup>2</sup> Source: Institute of Medicine Food and Nutrition Board 2001. Dietary Reference Intakes for Vitamin A, Vitamin K, Arsenic, Boron, Chromium, Copper, Iodine, Iron, Manganese, Molybdenum, Nickel, Silicon, Vanadium, and Zinc. Washington, DC: National Academy Press.<sup>3</sup> as % of energy excluded alcohol

SFA = Saturated Fatty Acids

PUFA = Polyunsaturated Fatty Acids

**Table B** - PANDiet index for non-consumer of whole grain and across tertiles of mean daily whole grain intakes in adults/older adults

|                         | Non-consumers      |       | Consumers           |       |                     |       |                    |       | p*     |
|-------------------------|--------------------|-------|---------------------|-------|---------------------|-------|--------------------|-------|--------|
|                         |                    |       | 0.1 to 5.7 g/d      |       | 5.8 to 14.9 g/d     |       | ≥15 g/d            |       |        |
|                         | n. 2189            |       | n. 212              |       | n. 217              |       | n. 212             |       |        |
|                         | Mean               | SD    | Mean                | SD    | Mean                | SD    | Mean               | SD    |        |
| PANDiet                 | 59.23 <sup>b</sup> | 8.7   | 61.12 <sup>a</sup>  | 9.03  | 60.23               | 9.09  | 61.83 <sup>a</sup> | 8.93  | <.0001 |
| Moderation              | 52.95              | 19.62 | 53.18               | 19.93 | 54.13               | 18.97 | 51.81              | 18.23 | NS     |
| Total Carbohydrates     | 0.98               | 0.11  | 1.00                | 0.03  | 0.96                | 0.14  | 0.98               | 0.12  | NS     |
| Total Fats              | 0.37               | 0.40  | 0.37                | 0.41  | 0.35                | 0.40  | 0.38               | 0.41  | NS     |
| SFA                     | 0.34               | 0.37  | 0.33                | 0.37  | 0.31                | 0.37  | 0.31               | 0.36  | NS     |
| Cholesterol             | 0.60 <sup>b</sup>  | 0.40  | 0.62                | 0.40  | 0.70 <sup>a</sup>   | 0.38  | 0.68 <sup>a</sup>  | 0.38  | 0.0002 |
| Sodium                  | 0.62               | 0.35  | 0.65                | 0.34  | 0.67                | 0.32  | 0.66               | 0.33  | NS     |
| Adequacy                | 65.51 <sup>6</sup> | 15.11 | 69.10 <sup>c</sup>  | 13.62 | 66.34 <sup>b</sup>  | 14.46 | 71.86              | 12.46 | <.0001 |
| Proteins                | 0.91 <sup>b</sup>  | 0.19  | 0.92 <sup>a</sup>   | 0.17  | 0.88                | 0.23  | 0.94               | 0.14  | 0.0092 |
| Total Carbohydrates     | 0.62               | 0.41  | 0.64                | 0.40  | 0.60                | 0.41  | 0.62               | 0.41  | NS     |
| Total Fats              | 1.00               | 0.05  | 1.00                | 0.00  | 0.99                | 0.05  | 0.99               | 0.07  | NS     |
| PUFA                    | 0.92               | 0.17  | 0.92                | 0.16  | 0.90                | 0.20  | 0.93               | 0.15  | NS     |
| Dietary fibre           | 0.19 <sup>b</sup>  | 0.26  | 0.22 <sup>b</sup>   | 0.27  | 0.21 <sup>b</sup>   | 0.27  | 0.33 <sup>a</sup>  | 0.32  | <.0001 |
| Vitamin A               | 0.74 <sup>b</sup>  | 0.29  | 0.79                | 0.25  | 0.78                | 0.27  | 0.81 <sup>a</sup>  | 0.27  | 0.0004 |
| Thiamine                | 0.48 <sup>b</sup>  | 0.33  | 0.56 <sup>a</sup>   | 0.33  | 0.54                | 0.33  | 0.61 <sup>a</sup>  | 0.31  | <.0001 |
| Riboflavin              | 0.63 <sup>b</sup>  | 0.33  | 0.77 <sup>c</sup>   | 0.26  | 0.69 <sup>b</sup>   | 0.31  | 0.77 <sup>a</sup>  | 0.27  | <.0001 |
| Niacin                  | 0.73               | 0.29  | 0.73                | 0.30  | 0.70                | 0.30  | 0.78               | 0.24  | NS     |
| Vitamin B <sub>6</sub>  | 0.86 <sup>b</sup>  | 0.22  | 0.90                | 0.19  | 0.87                | 0.23  | 0.92 <sup>a</sup>  | 0.16  | 0.0002 |
| Folate                  | 0.49 <sup>b</sup>  | 0.37  | 0.56                | 0.35  | 0.48 <sup>b</sup>   | 0.35  | 0.61 <sup>a</sup>  | 0.35  | <.0001 |
| Vitamin B <sub>12</sub> | 0.89               | 0.18  | 0.91                | 0.14  | 0.88                | 0.20  | 0.90               | 0.17  | NS     |
| Vitamin C               | 0.70 <sup>b</sup>  | 0.33  | 0.78 <sup>a</sup>   | 0.27  | 0.77                | 0.28  | 0.80 <sup>a</sup>  | 0.28  | <.0001 |
| Vitamin D               | 0.03               | 0.11  | 0.04                | 0.12  | 0.03                | 0.11  | 0.03               | 0.09  | NS     |
| Vitamin E               | 0.46 <sup>b</sup>  | 0.33  | 0.52 <sup>a</sup>   | 0.33  | 0.46                | 0.33  | 0.51               | 0.33  | 0.0149 |
| Calcium                 | 0.37 <sup>b</sup>  | 0.34  | 0.44 <sup>c</sup>   | 0.34  | 0.41 <sup>b</sup>   | 0.34  | 0.53 <sup>a</sup>  | 0.36  | <.0001 |
| Magnesium               | 0.89 <sup>b</sup>  | 0.22  | 0.91                | 0.20  | 0.90 <sup>b</sup>   | 0.20  | 0.97 <sup>a</sup>  | 0.10  | <.0001 |
| Zinc                    | 0.80 <sup>b</sup>  | 0.25  | 0.85 <sup>c</sup>   | 0.23  | 0.79 <sup>b</sup>   | 0.26  | 0.88 <sup>a</sup>  | 0.18  | <.0001 |
| Phosphorous             | 0.97 <sup>b</sup>  | 0.10  | 0.98                | 0.09  | 0.96 <sup>b</sup>   | 0.10  | 0.99 <sup>a</sup>  | 0.03  | 0.0005 |
| Potassium               | 0.19 <sup>b</sup>  | 0.24  | 0.22                | 0.27  | 0.21                | 0.25  | 0.26 <sup>a</sup>  | 0.27  | 0.0002 |
| Iron                    | 0.88 <sup>a</sup>  | 0.21  | 0.86 <sup>b,d</sup> | 0.22  | 0.87 <sup>b,d</sup> | 0.20  | 0.92 <sup>a</sup>  | 0.14  | 0.0008 |

<sup>a,b,c,d</sup> Mean values with unlike superscript letters were significantly different according to Dunn's *post hoc* test for pairwise comparison, p <0.05

\* p values from the Kruskal-Wallis test, non-consumers vs tertiles of consumption

SD = Standard Deviation

NS = non significant

SFA = Saturated Fatty Acids

PUFA = Polyunsaturated Fatty Acids

**Table C** - Mean adequacy for non-consumer of whole grain and across tertiles of mean daily wholegrain intakes in children/adolescents.

|                         | Non-consumers     |      | Consumers         |      |                |      |          |      | p*     |
|-------------------------|-------------------|------|-------------------|------|----------------|------|----------|------|--------|
|                         |                   |      | 0.1 to 2.7 g/d    |      | 2.8 to 8.7 g/d |      | ≥8.8 g/d |      |        |
|                         | Mean              | SD   | Mean              | SD   | Mean           | SD   | Mean     | SD   |        |
|                         | n. 336            |      | n. 35             |      | n. 35          |      | n. 34    |      |        |
| Fats                    | 1.25              | 0.17 | 1.26              | 0.11 | 1.20           | 0.13 | 1.21     | 0.18 | NS     |
| SFA                     | 1.16              | 0.22 | 1.19              | 0.21 | 1.18           | 0.17 | 1.21     | 0.30 | NS     |
| Total sugars            | 1.08              | 0.33 | 1.09              | 0.36 | 1.09           | 0.26 | 1.16     | 0.37 | NS     |
| Dietary fibre           | 0.88              | 0.22 | 0.91              | 0.19 | 0.93           | 0.21 | 1.02     | 0.38 | NS     |
| Riboflavin              | 1.79              | 0.74 | 2.07              | 0.69 | 1.88           | 0.49 | 1.92     | 0.74 | 0.0461 |
| Thiamine                | 1.46              | 0.56 | 1.73              | 0.64 | 1.55           | 0.42 | 1.64     | 0.64 | 0.0397 |
| Vitamin C               | 2.40              | 1.74 | 2.80              | 1.90 | 2.77           | 1.66 | 2.65     | 2.12 | NS     |
| Vitamin B <sub>12</sub> | 4.11 <sup>a</sup> | 3.22 | 5.68 <sup>b</sup> | 5.19 | 4.11           | 2.24 | 4.28     | 2.55 | 0.0248 |
| Vitamin A               | 2.09              | 2.57 | 1.96              | 0.90 | 2.09           | 1.46 | 2.41     | 3.01 | NS     |
| Calcium                 | 0.81              | 0.31 | 0.93              | 0.36 | 0.89           | 0.24 | 0.89     | 0.31 | NS     |
| Iron                    | 1.54 <sup>a</sup> | 0.63 | 1.90 <sup>b</sup> | 0.77 | 1.77           | 0.57 | 1.69     | 0.58 | 0.0037 |

<sup>a,b,c</sup> Mean values with unlike superscript letters were significantly different according to Dunn's *post hoc* test for pairwise comparison,  $p < 0.05$

\*p values from the Kruskal-Wallis test, non-consumers vs tertiles of consumption

SD = Standard Deviation

NS = non significant

SFA = Saturated Fatty Acids

**Table D1** - Daily food groups intakes (g/d) for non-consumer of whole grain and across tertiles of mean daily whole grain intakes in adults/older adults

|                                         | Non-consumers      |       | Consumers           |       |                    |       |                     |       | p*     |
|-----------------------------------------|--------------------|-------|---------------------|-------|--------------------|-------|---------------------|-------|--------|
|                                         | Mean               | SD    | 0.1 to 5.7 g/d      |       | 5.7 to 14.9 g/d    |       | ≥ 15 g/d            |       |        |
|                                         |                    |       | Mean                | SD    | Mean               | SD    | Mean                | SD    |        |
|                                         | n. 2189            |       | n. 212              |       | n. 217             |       | n. 212              |       |        |
| Cereals and cereal products             | 263.0 <sup>a</sup> | 103.9 | 258.8 <sup>ab</sup> | 116.7 | 232.5 <sup>b</sup> | 98.5  | 251.0 <sup>ab</sup> | 92.6  | 0.0002 |
| Legumes, fresh and processed            | 11.1               | 23.5  | 12.7                | 25.2  | 10.8               | 17.9  | 14.1                | 26.6  | NS     |
| Vegetables, fresh and processed         | 221.2              | 108.1 | 214.2               | 105.1 | 226.5              | 113.3 | 239.1               | 151.2 | NS     |
| Potatoes, tubers and products           | 51.4               | 55.3  | 55.0                | 59.3  | 45.0               | 53.8  | 48.7                | 55.1  | NS     |
| Fruit, fresh and processed              | 210.1 <sup>a</sup> | 158.8 | 237.3 <sup>b</sup>  | 161.1 | 255.0 <sup>b</sup> | 162.5 | 258.9 <sup>b</sup>  | 167.3 | <.0001 |
| Meat, meat products                     | 113.2 <sup>a</sup> | 63.0  | 107.4 <sup>ab</sup> | 57.8  | 97.5 <sup>b</sup>  | 59.1  | 101.8 <sup>b</sup>  | 79.3  | <.0001 |
| Fish, seafood and their products        | 45.6               | 52.3  | 42.9                | 46.3  | 43.8               | 47.8  | 42.9                | 46.8  | NS     |
| Milk, milk products                     | 178.6 <sup>a</sup> | 120.1 | 213.8 <sup>b</sup>  | 112.8 | 204.9 <sup>b</sup> | 124.1 | 236.2 <sup>b</sup>  | 142.3 | <.0001 |
| Oils & fats                             | 41.7 <sup>a</sup>  | 16.2  | 42.4 <sup>ab</sup>  | 18.1  | 37.4 <sup>b</sup>  | 15.6  | 40.1 <sup>ab</sup>  | 16.9  | 0.002  |
| Alcoholic beverages                     | 113.3 <sup>a</sup> | 163.0 | 79.9 <sup>ab</sup>  | 126.0 | 81.0 <sup>b</sup>  | 121.2 | 89.3 <sup>ab</sup>  | 132.6 | 0.002  |
| Sweet products                          | 31.8               | 32.5  | 35.0                | 30.6  | 35.4               | 34.7  | 34.7                | 31.4  | NS     |
| Meal substitutes                        | 0.0                | 1.2   | 0.0                 | 0.0   | 0.1                | 2.1   | 0.0                 | 0.0   | NS     |
| Eggs                                    | 21.8               | 24.8  | 19.3                | 22.5  | 18.3               | 22.3  | 20.1                | 26.1  | NS     |
| Water and other non alcoholic beverages | 824.7 <sup>a</sup> | 421.3 | 959.6 <sup>b</sup>  | 461.8 | 939.9 <sup>b</sup> | 431.7 | 960.8 <sup>b</sup>  | 498.2 | <.0001 |
| Miscellaneous                           | 3.1                | 3.8   | 3.5                 | 3.9   | 3.4                | 4.1   | 3.9                 | 4.7   | NS     |

<sup>a,b,c</sup> Mean values with unlike superscript letters were significantly different according to Dunn's *post hoc* test for pairwise comparison, p <0.05

\*p values from the Kruskal-Wallis test, non-consumers vs tertiles of consumption

SD = Standard Deviation

NS = non significant

**Table D2** - Daily food groups intakes (g/d) for non-consumer of whole grain and across tertiles of mean daily wholegrain intakes in children/adolescents

|                                         | Non-consumers      |       | Consumers      |       |                    |       |                    |       | P*    |
|-----------------------------------------|--------------------|-------|----------------|-------|--------------------|-------|--------------------|-------|-------|
|                                         |                    |       | 0.1 to 2.7 g/d |       | 2.8 to 8.7 g/d     |       | ≥8.8 g/d           |       |       |
|                                         | Mean               | SD    | Mean           | SD    | Mean               | SD    | Mean               | SD    |       |
|                                         | n. 336             |       | n.35           |       | n.35               |       | n.34               |       |       |
| Cereals and cereal products             | 264.6              | 111.1 | 285.4          | 96.0  | 268.9              | 77.2  | 313.3              | 103.6 | NS    |
| Legumes, fresh and processed            | 10.2               | 18.8  | 12.8           | 22.3  | 15.4               | 26.6  | 11.8               | 18.0  | NS    |
| Vegetables, fresh and processed         | 151.3              | 85.8  | 176.4          | 89.8  | 173.1              | 88.0  | 185.9              | 92.5  | NS    |
| Potatoes, tubers and products           | 55.9 <sup>ab</sup> | 54.7  | 50.1           | 55.0  | 39.9 <sup>a</sup>  | 53.6  | 39.4 <sup>ab</sup> | 49.7  | 0.011 |
| Fruit, fresh and processed              | 146.2              | 103.8 | 163.0          | 140.5 | 159.4              | 131.9 | 141.6              | 135.2 | NS    |
| Meat, meat products                     | 111.7              | 54.5  | 118.3          | 59.8  | 103.9              | 69.3  | 126.6              | 53.1  | 0.043 |
| Fish, seafood and their products        | 44.1               | 49.6  | 48.7           | 58.2  | 71.5               | 77.4  | 31.4               | 41.2  | NS    |
| Milk, milk products                     | 234.5              | 122.2 | 267.0          | 119.8 | 275.8              | 126.1 | 267.2              | 103.1 | NS    |
| Oils & fats                             | 37.4               | 15.6  | 39.3           | 16.1  | 41.0               | 14.6  | 40.0               | 17.1  | NS    |
| Alcoholic beverages                     | 1.9                | 11.8  | 1.4            | 8.0   | 0.0                | 0.1   | 2.9                | 12.0  | NS    |
| Sweet products                          | 38.4               | 37.5  | 44.4           | 41.8  | 42.3               | 38.8  | 42.4               | 41.6  | NS    |
| Meal substitutes                        | 0.0                | 0.0   | 0.0            | 0.0   | 0.0                | 0.0   | 0.0                | 0.0   | NS    |
| Eggs                                    | 20.1 <sup>ab</sup> | 23.3  | 21.8           | 28.0  | 22.0 <sup>ab</sup> | 33.5  | 27.8 <sup>a</sup>  | 24.8  | 0.011 |
| Water and other non alcoholic beverages | 757.7              | 373.9 | 804.4          | 384.9 | 798.5              | 366.0 | 857.2              | 495.5 | NS    |
| Miscellaneous                           | 2.5 <sup>a</sup>   | 3.3   | 3.4            | 3.4   | 3.0 <sup>ab</sup>  | 3.3   | 4.1 <sup>b</sup>   | 4.0   | 0.007 |

<sup>a,b,c</sup> Mean values with unlike superscript letters were significantly different according to Dunn's *post hoc* test for pairwise comparison,  $p < 0.05$

\*p values from the Kruskal-Wallis test, non-consumers vs tertiles of consumption

SD = Standard Deviation

NS = non significant
